# Supplementary material for: Glucocerebrosidase reduces the spread of protein aggregation in a Drosophila melanogaster model of neurodegeneration by regulating proteins trafficked by extracellular vesicles
Source: PubMed Central journal article supplement (PMC7888665; doi:10.1371/journal.pgen.1008859), 2021-02-04
Supplement: pgen.1008859.s009.pdf [file pgen.1008859.s009.pdf]

**S1 Table. Summary of Lifespans in Fig 1D**

| <b>Genotype</b>                                | <b><i>N</i></b> | <b>Mean survival<br/>(days)</b> | <b>95% Confidence<br/>Interval</b> | <b><i>p</i>*</b> |
|------------------------------------------------|-----------------|---------------------------------|------------------------------------|------------------|
| Control                                        | 416             | 60                              | 61,64                              | < 0.0001         |
| <i>Gba1b</i>                                   | 535             | 35                              | 34,35                              | 0.0001           |
| <i>Act88F-GAL4&gt;UAS-Gba1b</i> ; control      | 409             | 73                              | 71,75                              | < 0.0001         |
| <i>Act88F-GAL4&gt;UAS-Gba1b</i> ; <i>Gba1b</i> | 512             | 71                              | 72,76                              | < 0.0001         |

\* *p* values determined by Cox proportional hazards model to test for equality of survival curves among all genotypes.
