# Supplementary material for: Glucocerebrosidase reduces the spread of protein aggregation in a Drosophila melanogaster model of neurodegeneration by regulating proteins trafficked by extracellular vesicles
Source: PubMed Central journal article supplement (PMC7888665; doi:10.1371/journal.pgen.1008859), 2021-02-04
Supplement: pgen.1008859.s010.pdf [file pgen.1008859.s010.pdf]

**S2 Table. Summary of Lifespans in Fig 2E**

| <b>Genotype</b>                              | <b>N</b> | <b>Mean survival (days)</b> | <b>95% Confidence Interval</b> | <b>p*</b> |
|----------------------------------------------|----------|-----------------------------|--------------------------------|-----------|
| Control                                      | 392      | 60                          | 59,62                          | < 0.0001  |
| <i>Gba1b</i>                                 | 370      | 29                          | 29,29                          | 0.0019    |
| <i>Elav-GAL4&gt;UAS-Gba1b</i> ; control      | 519      | 58                          | 57,59                          | < 0.0001  |
| <i>Elav-GAL4&gt;UAS-Gba1b</i> ; <i>Gba1b</i> | 503      | 44                          | 43,45                          | < 0.0001  |

\* *p* values determined by Cox proportional hazards model to test for equality of survival curves among all genotypes.
